# Supplementary material for: Krebs von den Lungen-6 as Disease Severity Marker for COVID-19 Patients: Analytical Verification and Quality Assessment of the Tosoh AIA-360 Compared to Lumipulse G600II
Source: MDPI journal article supplement (doi:10.3390/ijerph19042176), 2022-02-15
Supplement: s1 [file s1]

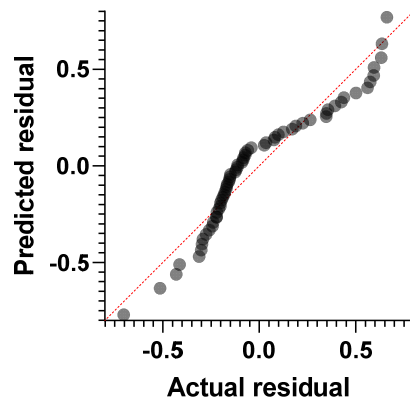

Figure S1. The QQ plot obtained using four degrees of freedom (Lumipulse KL-6 T0 and KL-6 T1, AIA360 KL-6 T0 and KL-6 T1) with the coefficient of determination ( $R^2$ ) of the regression analysis of 0.5977.
